# Supplementary material for: Sensation of the tiniest kind: the antennal sensilla of the smallest free-living insect Scydosella musawasensis (Coleoptera: Ptiliidae)
Source: PeerJ. 2020 Nov 23;8:e10401. doi: 10.7717/peerj.10401 (PMC7690297; doi:10.7717/peerj.10401)
Supplement: Table S1 [file peerj-08-10401-s001.xlsx]

## Sheet: female sensilla
specimen	sex	antennal sensilla type	length, μm	diameter, μm
1	f	TS1	0.490884	0.490884			TS1 length	TS1 diameter	TS2 length	TS2 diameter	TS3 length	TS3 diameter	TS4 length	TS4 diameter	ChS length	ChS diameter	SS1 length	SS1 diameter	BS1 length	BS1 diameter	BS2 length	BS2 diameter	SS2 length	SS2 diameter
1	f	TS1	0.504909	0.490884			0.490884	0.490884	6.60589	0.575035	15.1613	0.799439	3.15399	0.435993	12.8331	0.603086	4.75474	0.660593	9.44802	0.768132	8.39568	0.81422	0.791536	0.352665
1	f	TS2	6.60589	0.575035			0.504909	0.490884	6.69004	0.392707	15.007	0.967742	2.53024	0.393145	10.3647	0.448808	4.75474	0.660593	6.02804	0.755452	7.86567	0.768132	0.664112	0.306513
1	f	TS2	6.69004	0.392707			0.701262	0.448808	7.91024	0.58906	15.4418	0.967742	2.01964	0.490884	12.777	0.631136	3.30997	0.630841	7.07165	0.755452	10.6463	0.760451	0.658307	0.329154
1	f	TS2	7.91024	0.58906			0.518934	0.392707	7.36325	0.462833	10.3647	0.841515	2.63752	0.324401	8.24766	0.576324	3.68864	0.659187	7.14174	0.825545	7.28193	0.778816	0.661903	0.330278
1	f	ChS	12.8331	0.603086			0.743338	0.434783	5.90463	0.518934	11.655	0.771388	3.05184	0.409699	8.14642	0.521807	3.16971	0.434783	9.07919	0.902394	6.23077	0.771028	0.525529	0.317559
1	f	ChS	10.3647	0.448808			0.679468	0.413589	5.554	0.448808	12.6928	0.715288	2.16555	0.48495	5.79439	0.607477	4.59302	0.697674	7.56645	0.789037	7.64798	0.76324
1	f	ChS	12.777	0.631136			0.516987	0.502216	6.69004	0.546985	10.9397	0.841515	2.26589	0.376254	8.89201	0.575035	3.92102	0.67701	6.65726	0.832158	10.5936	0.735786
1	f	TS3	15.1613	0.799439			0.546529	0.339734	8.73773	0.56101	13.6466	0.88359	3.12709	0.392977	8.90603	0.631136	3.34921	0.555556	6.72779	0.789845	11.3378	0.819398
1	f	TS3	15.007	0.967742			0.605613	0.457903	10.2805	0.58906	14.3338	1.05189	1.89376	0.323326	10.6452	0.659187	3.56952	0.494652	6.37518	0.719323	6.90199	0.747508
1	f	TS3	15.4418	0.967742			0.546529	0.413589	9.11374	0.694239	13.1462	0.635155	4.46488	0.510033	7.9616	0.620384	3.91433	0.797637	5.81963	0.740443	9.06069	0.662502
1	f	TS4	3.15399	0.435993			0.832158	0.507757	12.2895	0.576071	13.2201	0.871492	2.36337	0.369276	8.44904	0.664697	3.50218	0.547698	6.34573	0.662502	7.33806	0.612009
1	f	TS4	2.53024	0.393145			0.58906	0.434783	10.1034	0.605613	13.6189	1.04874	3.28037	0.364486	8.44904	0.576071	3.69245	0.554067	5.93004	0.792404	9.06355	0.777592
1	f	SS1	4.75474	0.660593			0.650794	0.507937	10.5642	0.564175	11.3681	0.874471	2.63378	0.443144	7.06629	0.606488	3.65075	0.56392	6.0739	0.762125	7.13211	0.769231
1	f	SS1	4.75474	0.660593			0.777778	0.444444	9.01269	0.521862	9.57687	0.747532	2.56107	0.416559	9.21016	0.634697	5.12305	0.68126	5.31178	0.727483	8.02676	0.568562
1	f	BS1	9.44802	0.768132			0.888889	0.444444	8.47673	0.550071	9.71791	0.874471	2.03259	0.384789	9.06911	0.521862			5.80268	0.794314	7.08723	0.732087
1	f	BS2	8.39568	0.81422			0.650794	0.365079	9.81767	0.659187	14.2637	0.897616			9.7756	0.518934			6.1204	0.911371	7.12821	0.769231
1	f	BS2	7.86567	0.768132			0.78877	0.614973	8.65358	0.715288	14.4741	0.85554			8.96213	0.476858			7.99331	0.794314	8.83028	0.672783
1	f	BS2	10.6463	0.760451			0.545244	0.452436	8.09257	0.673212	14.7125	0.631136			9.92987	0.546985			5.56845	0.661253	9.29016	0.687422
2	f	TS1	0.701262	0.448808			0.49884	0.417633	7.31746	0.492063	14.619	1.03175			9.14286	0.619048			6.89095	0.916473	8.35866	0.559153
2	f	TS1	0.518934	0.392707			0.502216	0.369276	7.53968	0.31746	13.7619	0.936508			8.71429	0.698413			7.81903	0.87007	9.46924	0.540709
2	f	TS2	7.36325	0.462833			0.738552	0.457903	10.2222	0.47619	12.8254	0.873016			10	0.619048			7.23364	0.813084	7.69272	0.720447
2	f	TS2	5.90463	0.518934			0.649926	0.413589	7.79412	0.481283	11.9652	0.815508			7.33957	0.481283			8.03846	0.615385	8.39859	0.655073
2	f	TS2	5.554	0.448808			0.605613	0.413589	5.28075	0.347594	11.4572	0.775401			8.50267	0.574866			7.87179	0.884615	7.73955	0.682058
2	f	TS3	10.3647	0.841515			0.651341	0.395913	9.50535	0.494652	11.7647	0.882353			8.18182	0.467914			6.34738	0.715198
2	f	TS3	11.655	0.771388			0.600255	0.357599	6.3109	0.406032	12.587	1.05568			9.52436	0.580046			6.58027	0.685619
2	f	TS3	12.6928	0.715288			0.743882	0.472498	10.3248	0.417633	12.5638	1.05568			10.1276	0.62645			7.12375	0.744147
2	f	TS4	2.01964	0.490884			0.450229	0.273125	8.41067	0.568445	13.0858	0.99768			8.20186	0.487239			7.8211	0.848624
2	f	ChS	8.24766	0.576324					11.5953	0.576071	13.1758	1.06352			11.2555	0.546529			7.08716	0.688073
2	f	ChS	8.14642	0.521807					7.4003	0.354505	13.4564	0.930576			11.935	0.576071
2	f	ChS	5.79439	0.607477					12.2009	0.70901	15.096	0.871492			8.74446	0.546529
2	f	SS1	3.30997	0.630841		number	27	27	30	30	30	30	15	15	30	30	14	14	28	28	23	23	5	5
2	f	BS1	6.02804	0.755452		mean	0.630326	0.434373	8.52543	0.529503	12.99	0.885514	2.67877	0.407994	9.08201	0.576862	3.92809	0.615391	6.91806	0.780621	8.32685	0.711628	0.660278	0.327234
2	f	BS1	7.07165	0.755452		SD	0.116454	0.0658716	1.89314	0.106536	1.61317	0.119573	0.66329	0.0565945	1.5656	0.0633522	0.621974	0.0945161	1.01506	0.0790166	1.30676	0.0806823	0.0940839	0.0171945
2	f	BS1	7.14174	0.825545
2	f	BS2	7.28193	0.778816
2	f	BS2	6.23077	0.771028
2	f	BS2	7.64798	0.76324
3	f	TS1	0.743338	0.434783
3	f	TS2	6.69004	0.546985
3	f	TS2	8.73773	0.56101
3	f	TS2	10.2805	0.58906
3	f	TS3	10.9397	0.841515
3	f	TS3	13.6466	0.88359
3	f	TS3	14.3338	1.05189
3	f	TS4	2.63752	0.324401
3	f	ChS	8.89201	0.575035
3	f	ChS	8.90603	0.631136
3	f	ChS	10.6452	0.659187
3	f	SS1	3.68864	0.659187
3	f	SS1	3.16971	0.434783
3	f	BS1	9.07919	0.902394
3	f	BS2	10.5936	0.735786
3	f	BS2	11.3378	0.819398
4	f	TS1	0.679468	0.413589
4	f	TS1	0.516987	0.502216
4	f	TS1	0.546529	0.339734
4	f	TS2	9.11374	0.694239
4	f	TS2	12.2895	0.576071
4	f	TS2	10.1034	0.605613
4	f	TS3	13.1462	0.635155
4	f	TS3	13.2201	0.871492
4	f	TS3	13.6189	1.04874
4	f	TS4	3.05184	0.409699
4	f	ChS	7.9616	0.620384
4	f	ChS	8.44904	0.664697
4	f	ChS	8.44904	0.576071
4	f	SS1	4.59302	0.697674
4	f	BS1	7.56645	0.789037
5	f	TS1	0.605613	0.457903
5	f	TS1	0.546529	0.413589
5	f	TS1	0.832158	0.507757
5	f	TS2	10.5642	0.564175
5	f	TS2	9.01269	0.521862
5	f	TS2	8.47673	0.550071
5	f	TS3	11.3681	0.874471
5	f	TS3	9.57687	0.747532
5	f	TS3	9.71791	0.874471
5	f	TS4	2.16555	0.48495
5	f	TS4	2.26589	0.376254
5	f	BS1	6.65726	0.832158
5	f	BS1	6.72779	0.789845
5	f	BS1	6.37518	0.719323
5	f	BS2	6.90199	0.747508
5	f	ChS	7.06629	0.606488
5	f	ChS	9.21016	0.634697
5	f	ChS	9.06911	0.521862
5	f	SS1	3.92102	0.67701
6	f	TS1	0.58906	0.434783
6	f	TS2	9.81767	0.659187
6	f	TS2	8.65358	0.715288
6	f	TS2	8.09257	0.673212
6	f	TS3	14.2637	0.897616
6	f	TS3	14.4741	0.85554
6	f	TS3	14.7125	0.631136
6	f	TS4	3.12709	0.392977
6	f	ChS	9.7756	0.518934
6	f	ChS	8.96213	0.476858
6	f	ChS	9.92987	0.546985
6	f	BS1	5.81963	0.740443
6	f	BS1	6.34573	0.662502
6	f	BS1	5.93004	0.792404
6	f	BS2	9.06069	0.662502
7	f	TS1	0.650794	0.507937
7	f	TS1	0.777778	0.444444
7	f	TS2	7.31746	0.492063
7	f	TS2	7.53968	0.31746
7	f	TS2	10.2222	0.47619
7	f	TS3	14.619	1.03175
7	f	TS3	13.7619	0.936508
7	f	TS3	12.8254	0.873016
7	f	ChS	9.14286	0.619048
7	f	ChS	8.71429	0.698413
7	f	ChS	10	0.619048
7	f	SS1	3.34921	0.555556
7	f	BS1	6.0739	0.762125
7	f	BS1	5.31178	0.727483
7	f	BS2	7.33806	0.612009
7	f	TS4	1.89376	0.323326
8	f	TS1	0.888889	0.444444
8	f	TS1	0.650794	0.365079
8	f	TS1	0.78877	0.614973
8	f	TS2	7.79412	0.481283
8	f	TS2	5.28075	0.347594
8	f	TS2	9.50535	0.494652
8	f	TS3	11.9652	0.815508
8	f	TS3	11.4572	0.775401
8	f	TS3	11.7647	0.882353
8	f	TS4	4.46488	0.510033
8	f	ChS	7.33957	0.481283
8	f	ChS	8.50267	0.574866
8	f	ChS	8.18182	0.467914
8	f	SS1	3.56952	0.494652
8	f	BS1	5.80268	0.794314
8	f	BS1	6.1204	0.911371
8	f	BS1	7.99331	0.794314
8	f	BS2	9.06355	0.777592
8	f	BS2	7.13211	0.769231
8	f	BS2	8.02676	0.568562
9	f	TS1	0.545244	0.452436
9	f	TS1	0.49884	0.417633
9	f	TS1	0.502216	0.369276
9	f	TS2	6.3109	0.406032
9	f	TS2	10.3248	0.417633
9	f	TS2	8.41067	0.568445
9	f	TS3	12.587	1.05568
9	f	TS3	12.5638	1.05568
9	f	TS3	13.0858	0.99768
9	f	ChS	9.52436	0.580046
9	f	ChS	10.1276	0.62645
9	f	ChS	8.20186	0.487239
9	f	BS1	5.56845	0.661253
9	f	BS1	6.89095	0.916473
9	f	BS1	7.81903	0.87007
9	f	BS2	7.08723	0.732087
10	f	TS1	0.738552	0.457903
10	f	TS1	0.649926	0.413589
10	f	TS1	0.605613	0.413589
10	f	TS2	11.5953	0.576071
10	f	TS2	7.4003	0.354505
10	f	TS2	12.2009	0.70901
10	f	TS3	13.1758	1.06352
10	f	TS3	13.4564	0.930576
10	f	TS3	15.096	0.871492
10	f	TS4	2.36337	0.369276
10	f	TS4	3.28037	0.364486
10	f	ChS	11.2555	0.546529
10	f	ChS	11.935	0.576071
10	f	ChS	8.74446	0.546529
10	f	SS1	3.91433	0.797637
10	f	BS1	7.23364	0.813084
10	f	BS1	8.03846	0.615385
10	f	BS1	7.87179	0.884615
10	f	BS2	7.12821	0.769231
11	f	TS1	0.651341	0.395913
11	f	TS1	0.600255	0.357599
11	f	BS1	6.34738	0.715198
11	f	TS4	2.63378	0.443144
11	f	BS1	6.58027	0.685619
11	f	BS1	7.12375	0.744147
12	f	TS4	2.56107	0.416559
12	f	SS1	3.50218	0.547698
12	f	BS2	8.83028	0.672783
12	f	BS1	7.8211	0.848624
12	f	BS1	7.08716	0.688073
13	f	SS1	3.69245	0.554067
13	f	BS2	9.29016	0.687422
13	f	BS2	8.35866	0.559153
13	f	BS2	9.46924	0.540709
14	f	TS1	0.743882	0.472498
14	f	BS2	7.69272	0.720447
14	f	SS1	3.65075	0.56392
15	f	TS1	0.450229	0.273125
15	f	BS2	8.39859	0.655073
15	f	BS2	7.73955	0.682058
15	f	TS4	2.03259	0.384789
15	f	SS1	5.12305	0.68126
1	f	SS2	0.791536	0.352665
9	f	SS2	0.664112	0.306513
12	f	SS2	0.658307	0.329154
13	f	SS2	0.661903	0.330278
13	f	SS2	0.525529	0.317559

## Sheet: male sensilla
specimen	sex	antennal sensilla type	length, μm	diameter, μm			TS1 length	TS1 diameter	TS2 length	TS2 diameter	TS3 length	TS3 diameter	TS4 length	TS4 diameter	ChS length	ChS diameter	SS1 length	SS1 diameter	BS1 length	BS1 diameter	BS2 length	BS2 diameter	SS2 length	SS2 diameter
16	m	TS1	0.44164	0.394322			0.44164	0.394322	9.66877	0.473186	14.0379	0.820189	1.75601	0.443623	9.21136	0.504732	3.73016	0.674603	6.56079	0.799562	8.82804	0.700986	0.836093	0.438742
16	m	TS1	0.504732	0.410095			0.504732	0.410095	12.8707	0.583596	14.8107	0.835962	1.94962	0.525739	10.6625	0.504732	4.30427	0.630798	8.02839	0.788644	9.03785	0.678233	0.577367	0.300231
16	m	TS1	0.71953	0.543319			0.71953	0.543319	7.01893	0.473186	12.9811	0.851735	2.28333	0.475	12.3028	0.646688	3.82256	0.624315	7.42902	0.741325	7.84167	0.758333	0.713166	0.344828
16	m	TS2	9.66877	0.473186			0.669746	0.56582	9.61894	0.484988	16.097	0.889145	2.39774	0.465444	12.5635	0.51963	3.46923	0.607692	6.05678	0.741325	8.55833	0.741667	0.58906	0.420757
16	m	TS2	12.8707	0.583596			0.808314	0.508083	8.44111	0.612009	14.873	0.866051	2.56154	0.346154	12.0439	0.600462	4.5903	0.576923	6.6835	0.782828	8.76232	0.646221	0.931048	0.267035
16	m	TS2	7.01893	0.473186			0.567823	0.410095	11.3048	0.577367	14.873	0.785219	2.0298	0.353818	10.4503	0.51963	3.87124	0.62709	7.51684	0.740741	8.49231	0.761538	1.00038	0.275836
16	m	TS3	14.0379	0.820189			0.718085	0.452128	6.65121	0.408163	13.525	0.844156	3.21906	0.62709	9.87941	0.556586	4.19498	0.827179	7.76936	0.757576	8.93855	0.744879
16	m	TS3	14.8107	0.835962			0.638298	0.465426	7.36549	0.38961	12.3748	0.751391	1.51213	0.527817	11.577	0.463822	3.44828	0.676884	6.5288	0.84195	8.96465	0.816498
16	m	TS3	12.9811	0.851735			0.851064	0.510638	11.1224	0.510204	13.0983	0.80705	1.63344	0.521472	9.97217	0.519481	2.31162	0.421456	7.72526	0.871492	8.60429	0.705521
16	m	TS4	1.75601	0.443623			0.613409	0.370899	10.9504	0.567376	14.3262	1.02128	1.81354	0.498084	10.7801	0.638298	4.09524	0.539683	7.48892	0.886263	8.24684	0.701262
16	m	TS4	1.94962	0.525739			0.72747	0.510315	9.34752	0.553191	14.0426	0.907801	3.08851	0.734463	11.8865	0.553191	4.92347	0.502701	7.0547	0.827489	9.01163	0.722591
16	m	ChS	9.21136	0.504732			0.573308	0.291353	6.15603	0.468085	14.3262	0.893617	2.52508	0.384615	11.1064	0.567376	4.87696	0.684338	6.36746	0.911641	9.83278	0.652174
16	m	ChS	10.6625	0.504732			0.627803	0.373692	12.1398	0.613409	13.8231	0.998573	1.69326	0.351677	12.8673	0.556348	3.58568	0.554486	5.37167	0.827489	9.54614	0.936224
16	m	ChS	12.3028	0.646688			0.587484	0.510856	7.01854	0.513552	14.893	0.998573	3.74923	0.472349	10.4565	0.527817	2.08245	0.177413	6.43939	0.862524	8.08098	0.613936
16	m	BS1	6.56079	0.799562			0.651341	0.45977	7.33238	0.513552	14.0799	1.01284	1.22727	0.333454	9.91441	0.513552			7.39046	0.715786	9.5081	0.75226
16	m	BS2	8.82804	0.700986			0.631136	0.322581	6.54709	0.523169	13.6472	1.00149	2.94109	0.380439	9.40209	0.597907			7.21939	0.714286	9.12437	0.741471
17	m	TS1	0.669746	0.56582			0.498084	0.408685	9.73094	0.64275	14.1405	0.986547			10.0448	0.523169			5.87185	0.60024	10.7178	0.749326
17	m	TS1	0.808314	0.508083			0.650794	0.460317	8.81913	0.64275	13.8714	0.956652			11.5994	0.717489			8.38404	0.852938	8.442	0.566717
17	m	TS1	0.567823	0.410095			0.619048	0.444444	8.08429	0.600255	10.894	0.83014			6.89655	0.587484			8.16357	0.742086	9.55559	0.664595
17	m	TS2	9.61894	0.484988			0.543797	0.449365	8.72286	0.472542	9.83397	0.855683			8.53129	0.651341			7.9253	0.84174
17	m	TS2	8.44111	0.612009			0.46239	0.439596	5.74713	0.45977	10.2554	0.945083			4.92976	0.561941
17	m	TS2	11.3048	0.577367			0.496773	0.413269	8.78672	0.727969	11.3282	0.753512			7.35632	0.702427
17	m	TS3	16.097	0.889145			0.684934	0.503781	6.1175	0.536398	11.4049	0.715198			5.81098	0.536398
17	m	TS3	14.873	0.866051			0.630458	0.5485	5.64496	0.498084	10.5492	0.945083			7.04981	0.664112
17	m	TS3	14.873	0.785219					5.59427	0.501465	15.7864	0.807555			10.0879	0.65451
17	m	TS4	2.28333	0.475					9.59297	0.400521	14.9007	0.830348			11.6021	0.582872
17	m	TS4	2.39774	0.465444					7.36242	0.524259	14.7509	0.758711			14.2429	0.592641
17	m	ChS	12.5635	0.51963					7.98308	0.423062	12.438	0.77135			7.97914	0.570641
17	m	ChS	12.0439	0.600462					6.70405	0.354191	11.218	0.88351			7.79811	0.560803
17	m	ChS	10.4503	0.51963					4.77174	0.448642	11.5289	0.755608			10.5116	0.62377
17	m	SS1	3.73016	0.674603		number	24	24	30	30	30	30	16	16	30	30	14	14	20	20	19	19	6	6
17	m	BS1	8.02839	0.788644		mean	0.621561	0.448639	8.24054	0.516577	13.2903	0.869335	2.27379	0.465077	9.9839	0.577328	3.8076	0.580397	7.09877	0.792396	8.95233	0.718654	0.77452	0.341238
17	m	BS1	7.42902	0.741325		SD	0.102347	0.0699298	2.08307	0.0848118	1.71261	0.0906692	0.702751	0.110048	2.17401	0.0624045	0.831959	0.15021	0.828541	0.074658	0.676945	0.0793051	0.176825	0.0739031
17	m	BS1	6.05678	0.741325
17	m	BS2	9.03785	0.678233
17	m	BS2	7.84167	0.758333
17	m	BS2	8.55833	0.741667
18	m	TS2	6.65121	0.408163
18	m	TS2	7.36549	0.38961
18	m	TS2	11.1224	0.510204
18	m	TS3	13.525	0.844156
18	m	TS3	12.3748	0.751391
18	m	TS3	13.0983	0.80705
18	m	TS4	2.56154	0.346154
18	m	TS4	2.0298	0.353818
18	m	ChS	9.87941	0.556586
18	m	ChS	11.577	0.463822
18	m	ChS	9.97217	0.519481
18	m	SS1	4.30427	0.630798
18	m	SS1	3.82256	0.624315
18	m	SS1	3.46923	0.607692
18	m	BS2	8.76232	0.646221
18	m	BS2	8.49231	0.761538
18	m	BS2	8.93855	0.744879
19	m	TS1	0.718085	0.452128
19	m	TS1	0.638298	0.465426
19	m	TS1	0.851064	0.510638
19	m	TS2	10.9504	0.567376
19	m	TS2	9.34752	0.553191
19	m	TS2	6.15603	0.468085
19	m	TS3	14.3262	1.02128
19	m	TS3	14.0426	0.907801
19	m	TS3	14.3262	0.893617
19	m	TS4	3.21906	0.62709
19	m	ChS	10.7801	0.638298
19	m	ChS	11.8865	0.553191
19	m	ChS	11.1064	0.567376
19	m	SS1	4.5903	0.576923
19	m	SS1	3.87124	0.62709
20	m	TS1	0.613409	0.370899
20	m	TS1	0.72747	0.510315
20	m	TS1	0.573308	0.291353
20	m	TS2	12.1398	0.613409
20	m	TS2	7.01854	0.513552
20	m	TS2	7.33238	0.513552
20	m	TS3	13.8231	0.998573
20	m	TS3	14.893	0.998573
20	m	TS3	14.0799	1.01284
20	m	TS4	1.51213	0.527817
20	m	TS4	1.63344	0.521472
20	m	ChS	12.8673	0.556348
20	m	ChS	10.4565	0.527817
20	m	ChS	9.91441	0.513552
20	m	BS1	6.6835	0.782828
20	m	BS1	7.51684	0.740741
20	m	BS1	7.76936	0.757576
20	m	BS2	8.96465	0.816498
20	m	BS2	8.60429	0.705521
21	m	TS1	0.627803	0.373692
21	m	TS2	6.54709	0.523169
21	m	TS2	9.73094	0.64275
21	m	TS2	8.81913	0.64275
21	m	TS3	13.6472	1.00149
21	m	TS3	14.1405	0.986547
21	m	TS3	13.8714	0.956652
21	m	ChS	9.40209	0.597907
21	m	ChS	10.0448	0.523169
21	m	ChS	11.5994	0.717489
21	m	SS1	4.19498	0.827179
21	m	BS1	6.5288	0.84195
21	m	BS1	7.72526	0.871492
21	m	BS1	7.48892	0.886263
22	m	TS1	0.587484	0.510856
22	m	TS1	0.651341	0.45977
22	m	TS1	0.631136	0.322581
22	m	TS2	8.08429	0.600255
22	m	TS2	8.72286	0.472542
22	m	TS2	5.74713	0.45977
22	m	TS3	10.894	0.83014
22	m	TS3	9.83397	0.855683
22	m	TS3	10.2554	0.945083
22	m	TS4	1.81354	0.498084
22	m	ChS	6.89655	0.587484
22	m	ChS	8.53129	0.651341
22	m	ChS	4.92976	0.561941
22	m	SS1	3.44828	0.676884
22	m	BS1	7.0547	0.827489
22	m	BS1	6.36746	0.911641
22	m	BS1	5.37167	0.827489
22	m	BS2	8.24684	0.701262
22	m	BS2	9.01163	0.722591
23	m	TS1	0.498084	0.408685
23	m	TS1	0.650794	0.460317
23	m	TS1	0.619048	0.444444
23	m	TS2	8.78672	0.727969
23	m	TS2	6.1175	0.536398
23	m	TS2	5.64496	0.498084
23	m	TS3	11.3282	0.753512
23	m	TS3	11.4049	0.715198
23	m	TS3	10.5492	0.945083
23	m	TS4	3.08851	0.734463
23	m	TS4	2.52508	0.384615
23	m	ChS	7.35632	0.702427
23	m	ChS	5.81098	0.536398
23	m	ChS	7.04981	0.664112
23	m	SS1	2.31162	0.421456
23	m	SS1	4.09524	0.539683
23	m	BS1	6.43939	0.862524
23	m	BS2	9.83278	0.652174
23	m	BS2	9.54614	0.936224
23	m	BS2	8.08098	0.613936
24	m	TS1	0.543797	0.449365
24	m	TS1	0.46239	0.439596
24	m	TS2	5.59427	0.501465
24	m	TS2	9.59297	0.400521
24	m	TS2	7.36242	0.524259
24	m	TS3	15.7864	0.807555
24	m	TS3	14.9007	0.830348
24	m	TS3	14.7509	0.758711
24	m	TS4	1.69326	0.351677
24	m	ChS	10.0879	0.65451
24	m	ChS	11.6021	0.582872
24	m	ChS	14.2429	0.592641
24	m	SS1	4.92347	0.502701
24	m	BS1	7.39046	0.715786
24	m	BS1	7.21939	0.714286
24	m	BS1	5.87185	0.60024
25	m	TS1	0.496773	0.413269
25	m	TS2	7.98308	0.423062
25	m	TS2	6.70405	0.354191
25	m	TS2	4.77174	0.448642
25	m	TS3	12.438	0.77135
25	m	TS3	11.218	0.88351
25	m	TS3	11.5289	0.755608
25	m	TS4	3.74923	0.472349
25	m	TS4	1.22727	0.333454
25	m	ChS	7.97914	0.570641
25	m	ChS	7.79811	0.560803
25	m	ChS	10.5116	0.62377
25	m	SS1	4.87696	0.684338
25	m	BS1	8.38404	0.852938
25	m	BS1	8.16357	0.742086
25	m	BS2	9.5081	0.75226
25	m	BS2	9.12437	0.741471
26	m	SS1	3.58568	0.554486
26	m	TS4	2.94109	0.380439
26	m	BS1	7.9253	0.84174
26	m	BS2	10.7178	0.749326
26	m	BS2	8.442	0.566717
27	m	TS1	0.684934	0.503781
27	m	TS1	0.630458	0.5485
27	m	SS1	2.08245	0.177413
27	m	BS2	9.55559	0.664595
17	m	SS2	0.836093	0.438742
17	m	SS2	0.577367	0.300231
18	m	SS2	0.713166	0.344828
22	m	SS2	0.58906	0.420757
24	m	SS2	0.931048	0.267035
26	m	SS2	1.00038	0.275836

## Sheet: female antenna
specimen	sex	antennomere	length, μm	diameter, μm			sc length	sc diameter	pd length	pd diameter	fl length	fl diameter	club length	club diameter	antennal length
1	f	sc	10.9677	13.1417			10.9677	13.1417	12.777	8.35905	43.2398	15.8626	25.9607	15.7223	66.9846
1	f	pd	12.777	8.35905			8.05674	12.539	15.7872	8.62411	51.1064	14.0851	28.5674	14.0851	74.9504
1	f	fl	43.2398	15.8626			10.0139	12.4268	13.2497	8.92608	48.3821	13.2497	29.1353	13.2497	71.6457
1	f	club	25.9607	15.7223			11.1502	12.9073	15.9744	10.1917	50.1438	12.8115	27.492	12.8115	77.2684
2	f	sc	8.05674	12.539			8.20628	10.7025	16.0688	6.86099	50.1196	17.3842	30.299	17.3842	74.3946
2	f	pd	15.7872	8.62411			9.97046	10.4431	14.7267	7.26736	46.0561	14.6972	24.0325	14.6972	70.7533
2	f	fl	51.1064	14.0851			9.85804	13.6593	16.0568	10.1735	50.8202	14.1325	30.0473	14.1325	76.735
2	f	club	28.5674	14.0851			8.94891	11.8102	12.146	8.29197	46.7153	16.7737	29.1825	16.7737	67.8102
3	f	sc	10.0139	12.4268			8.66966	11.9731	14.3946	9.74589	52.6607	17.4141	28.6996	17.4141	75.725
3	f	pd	13.2497	8.92608			11.4649	12.4963	14.1704	9.0284	48.2511	16.2332	30.1794	16.2332	73.8864
3	f	fl	48.3821	13.2497		number	10	10	10	10	10	10	10	10	10
3	f	club	29.1353	13.2497		mean	9.73068	12.2099	14.5352	8.7469	48.7495	15.2644	28.3596	15.2503	73.0154
4	f	sc	11.1502	12.9073		SD	1.22789	1.01665	1.45097	1.123	2.81056	1.69176	2.01631	1.68682	3.59209
4	f	pd	15.9744	10.1917
4	f	fl	50.1438	12.8115
4	f	club	27.492	12.8115
5	f	sc	8.20628	10.7025
5	f	pd	16.0688	6.86099
5	f	fl	50.1196	17.3842
5	f	club	30.299	17.3842
6	f	sc	9.97046	10.4431
6	f	pd	14.7267	7.26736
6	f	fl	46.0561	14.6972
6	f	club	24.0325	14.6972
7	f	sc	9.85804	13.6593
7	f	pd	16.0568	10.1735
7	f	fl	50.8202	14.1325
7	f	club	30.0473	14.1325
8	f	sc	8.94891	11.8102
8	f	pd	12.146	8.29197
8	f	fl	46.7153	16.7737
8	f	club	29.1825	16.7737
9	f	sc	8.66966	11.9731
9	f	pd	14.3946	9.74589
9	f	fl	52.6607	17.4141
9	f	club	28.6996	17.4141
10	f	sc	11.4649	12.4963
10	f	pd	14.1704	9.0284
10	f	fl	48.2511	16.2332
10	f	club	30.1794	16.2332

## Sheet: male antenna
specimen	sex	antennomere	length, μm	diameter, μm			sc length	sc diameter	pd length	pd diameter	fl length	fl diameter	club length	club diameter	antennal length
16	m	sc	8.79365	12.254			8.79365	12.254	16.0476	9.79365	50.4127	16.0635	27.9073	16.0635	75.254
16	m	pd	16.0476	9.79365			10.1438	11.2939	15.2236	8.78594	53.77	13.5144	28.77	13.5144	79.1374
16	m	fl	50.4127	16.0635			11.4104	12.4683	14.7673	9.78843	47.4612	14.0621	28.11	14.0621	73.6389
16	m	club	27.9073	16.0635			11.3492	13.0291	14.3915	10.3571	45.1711	15.0661	27.8307	15.0661	70.9118
17	m	sc	10.1438	11.2939			9.03766	10.1395	11.046	8.41004	50.1395	12.4686	26.2483	12.4686	70.2232
17	m	pd	15.2236	8.78594			9.57164	11.226	13.7518	10.1182	50.9158	16.1743	28.7445	16.1743	74.2393
17	m	fl	53.77	13.5144			8.43427	12.0827	14.5347	9.86706	46.9572	14.2688	24.6086	14.2688	69.9261
17	m	club	28.77	13.5144			7.91878	13.2149	14.5347	10.2876	52.6734	14.3486	27.225	14.3486	75.1269
18	m	sc	11.4104	12.4683			8.57207	11.805	13.8361	9.66874	53.794	12.7785	29.7904	12.7785	76.2022
18	m	pd	14.7673	9.78843			6.90961	12.6023	15.0903	10.4198	53.6299	13.3027	27.7682	13.3027	75.6298
18	m	fl	47.4612	14.0621		number	10	10	10	10	10	10	10	10	10
18	m	club	28.11	14.0621		mean	9.21411	12.0116	14.3224	9.74967	50.4925	14.2048	27.7003	14.2048	74.029
19	m	sc	11.3492	13.0291		SD	1.43726	0.930007	1.33199	0.665876	3.1012	1.26754	1.44255	1.26754	2.93102
19	m	pd	14.3915	10.3571
19	m	fl	45.1711	15.0661
19	m	club	27.8307	15.0661
20	m	sc	9.03766	10.1395
20	m	pd	11.046	8.41004
20	m	fl	50.1395	12.4686
20	m	club	26.2483	12.4686
21	m	sc	9.57164	11.226
21	m	pd	13.7518	10.1182
21	m	fl	50.9158	16.1743
21	m	club	28.7445	16.1743
22	m	sc	8.43427	12.0827
22	m	pd	14.5347	9.86706
22	m	fl	46.9572	14.2688
22	m	club	24.6086	14.2688
23	m	sc	7.91878	13.2149
23	m	pd	14.5347	10.2876
23	m	fl	52.6734	14.3486
23	m	club	27.225	14.3486
24	m	sc	8.57207	11.805
24	m	pd	13.8361	9.66874
24	m	fl	53.794	12.7785
24	m	club	29.7904	12.7785
27	m	sc	6.90961	12.6023
27	m	pd	15.0903	10.4198
27	m	fl	53.6299	13.3027
27	m	club	27.7682	13.3027
