# Supplementary material for: Sensation of the tiniest kind: the antennal sensilla of the smallest free-living insect Scydosella musawasensis (Coleoptera: Ptiliidae)
Source: PeerJ. 2020 Nov 23;8:e10401. doi: 10.7717/peerj.10401 (PMC7690297; doi:10.7717/peerj.10401)
Supplement: Table S2 [file peerj-08-10401-s002.xlsx]

## Sheet: references
reference	family	secies	number of antennal sensilla	antennal sensilla types	ChS length, μm	ChS diameter, μm	BS1 length, μm	BS1 diameter, μm
Polilov, A. A. (2016). At the Size Limit — Effects of Miniaturization in Insects. https://doi.org/10.1007/978-3-319-39499-2	Ptiliidae	Primorskiella anodonta	160
Skilbeck, C. A., & Anderson, M. (1996). The ultrastructure, morphology and distribution of sensilla on the antennae of the adult parasitoids Aleochara bilineata Gyll. and Aleochara bipustulata L. (Coleoptera: Staphylinidae). International Journal of Insect Morphology and Embryology, 25(3), 261–280. https://doi.org/10.1016/0020-7322(96)00005-0	Staphylinidae	Aleochara bilineata	3100	8	65	2
Skilbeck, C. A., & Anderson, M. (1996). The ultrastructure, morphology and distribution of sensilla on the antennae of the adult parasitoids Aleochara bilineata Gyll. and Aleochara bipustulata L. (Coleoptera: Staphylinidae). International Journal of Insect Morphology and Embryology, 25(3), 261–280. https://doi.org/10.1016/0020-7322(96)00005-0	Staphylinidae	Aleochara bipustulata	3100	8	65	2
Oliva, A. (2012). The Antennal Sensilla of Oxelytrum erythrurum (Blanchard) and Oxelytrum apicale (Brullé) (Coleoptera: Silphidae). Neotropical Entomology, 41(5), 395–403. https://doi.org/10.1007/s13744-012-0060-x	Silphidae	Oxelytrum erythrurum	49000	10	40	5	7	2
Oliva, A. (2012). The Antennal Sensilla of Oxelytrum erythrurum (Blanchard) and Oxelytrum apicale (Brullé) (Coleoptera: Silphidae). Neotropical Entomology, 41(5), 395–403. https://doi.org/10.1007/s13744-012-0060-x	Silphidae	Oxelytrum apicale	49000	10	40	5	7	2
Ali, S. A. I., Diakite, M. M., Ali, S., & Wang, M.-Q. (2016). Effects of the Antennal Sensilla Distribution Pattern on the Behavioral Responses of Tribolium castaneum (Coleoptera: Tenebrionidae). Florida Entomologist, 99(1), 52–59. ; Seada, M. A., & Hamza, A. M. (2018). Differential morphology of the sensory sensilla of antennae, palpi, foretarsi and ovipositor of adult Tribolium castaneum (Herbs…	Tenebrionidae	Tribolium castaneum		8	10		19.8	4.98
Borden, J. H. (1968). Antennal Morphology of Ips confusus (Coleoptera: Scolytidae). Annals of the Entomological Society of America, 61(1), 10–13. ; Borden, J. H., & Wood, D. L. (1966). The Antennal Receptors and Olfactory Response of Ips confusus (Coleoptera: Scolytidae) to Male Sex Attractant in the Laboratory1. Annals of the Entomological Society of America, 59(2), 253–261. https://doi.org/10.1…	Scolytidae	Ips confusus		5	27	2.1	7	1.4
Di Giulio, A., Maurizi, E., Rossi Stacconi, M. V., & Romani, R. (2012). Functional structure of antennal sensilla in the myrmecophilous beetle Paussus favieri (Coleoptera, Carabidae, Paussini). Micron, 43(6), 705–719. https://doi.org/10.1016/j.micron.2011.10.013	Carabidae	Paussus favieri		17	91.31	3.2	14.37	1.76
Harbach, R. E., & Larsen, J. R. (1977). Fine structure of antennal sensilla of the adult mealworm beetle, Tenebrio molitor L. (Coleoptera : Tenebrionidae). International Journal of Insect Morphology and Embryology, 6(1), 41–60. https://doi.org/10.1016/0020-7322(77)90029-0	Tenebrionidae	Tenebrio molitor	4533	7	15.5	1.7	6.3	1.6
Moeck, A. (1967). Electron microscopic studies of antennal sensilla in the ambrosia beetle Trypodendron lineatum (Olivier) (Scolytidae).	Curculionidae	Trypodendron lineatum	1199	6	40	1	12	1.5
Payne, T. L., Moeck, H. A., Willson, C. D., Coulson, R. N., & Humphreys, W. J. (1973). Bark beetle olfaction-II. Antennal morphology of sixteen species of Scolytidae (Coleoptera). International Journal of Insect Morphology and Embryology, 2(3), 177–192. https://doi.org/10.1016/0020-7322(73)90027-5	Curculionidae	Dendroctonus adjunctus		6	60		11
Payne, T. L., Moeck, H. A., Willson, C. D., Coulson, R. N., & Humphreys, W. J. (1973). Bark beetle olfaction-II. Antennal morphology of sixteen species of Scolytidae (Coleoptera). International Journal of Insect Morphology and Embryology, 2(3), 177–192. https://doi.org/10.1016/0020-7322(73)90027-5	Curculionidae	Dendroctonus brevicomis		6	47		12
Payne, T. L., Moeck, H. A., Willson, C. D., Coulson, R. N., & Humphreys, W. J. (1973). Bark beetle olfaction-II. Antennal morphology of sixteen species of Scolytidae (Coleoptera). International Journal of Insect Morphology and Embryology, 2(3), 177–192. https://doi.org/10.1016/0020-7322(73)90027-5	Curculionidae	Dendroctonus frontalis		6	63		20
Payne, T. L., Moeck, H. A., Willson, C. D., Coulson, R. N., & Humphreys, W. J. (1973). Bark beetle olfaction-II. Antennal morphology of sixteen species of Scolytidae (Coleoptera). International Journal of Insect Morphology and Embryology, 2(3), 177–192. https://doi.org/10.1016/0020-7322(73)90027-5	Curculionidae	Dendroctonus ponderosae		6	62		11
Payne, T. L., Moeck, H. A., Willson, C. D., Coulson, R. N., & Humphreys, W. J. (1973). Bark beetle olfaction-II. Antennal morphology of sixteen species of Scolytidae (Coleoptera). International Journal of Insect Morphology and Embryology, 2(3), 177–192. https://doi.org/10.1016/0020-7322(73)90027-5	Curculionidae	Dendroctonus terebrans		6	83		11
Payne, T. L., Moeck, H. A., Willson, C. D., Coulson, R. N., & Humphreys, W. J. (1973). Bark beetle olfaction-II. Antennal morphology of sixteen species of Scolytidae (Coleoptera). International Journal of Insect Morphology and Embryology, 2(3), 177–192. https://doi.org/10.1016/0020-7322(73)90027-5	Curculionidae	Ips avulsus		6	78		11
Payne, T. L., Moeck, H. A., Willson, C. D., Coulson, R. N., & Humphreys, W. J. (1973). Bark beetle olfaction-II. Antennal morphology of sixteen species of Scolytidae (Coleoptera). International Journal of Insect Morphology and Embryology, 2(3), 177–192. https://doi.org/10.1016/0020-7322(73)90027-5	Curculionidae	Ips calligraphus		6	118		16
Payne, T. L., Moeck, H. A., Willson, C. D., Coulson, R. N., & Humphreys, W. J. (1973). Bark beetle olfaction-II. Antennal morphology of sixteen species of Scolytidae (Coleoptera). International Journal of Insect Morphology and Embryology, 2(3), 177–192. https://doi.org/10.1016/0020-7322(73)90027-5	Curculionidae	Pseudips concinnus		6	58		10
Payne, T. L., Moeck, H. A., Willson, C. D., Coulson, R. N., & Humphreys, W. J. (1973). Bark beetle olfaction-II. Antennal morphology of sixteen species of Scolytidae (Coleoptera). International Journal of Insect Morphology and Embryology, 2(3), 177–192. https://doi.org/10.1016/0020-7322(73)90027-5	Curculionidae	Ips grandicollis		6	143		16
Payne, T. L., Moeck, H. A., Willson, C. D., Coulson, R. N., & Humphreys, W. J. (1973). Bark beetle olfaction-II. Antennal morphology of sixteen species of Scolytidae (Coleoptera). International Journal of Insect Morphology and Embryology, 2(3), 177–192. https://doi.org/10.1016/0020-7322(73)90027-5	Curculionidae	Ips mexicanus		6	59		12
Payne, T. L., Moeck, H. A., Willson, C. D., Coulson, R. N., & Humphreys, W. J. (1973). Bark beetle olfaction-II. Antennal morphology of sixteen species of Scolytidae (Coleoptera). International Journal of Insect Morphology and Embryology, 2(3), 177–192. https://doi.org/10.1016/0020-7322(73)90027-5	Curculionidae	Ips paraconfusus		6	155		10
Payne, T. L., Moeck, H. A., Willson, C. D., Coulson, R. N., & Humphreys, W. J. (1973). Bark beetle olfaction-II. Antennal morphology of sixteen species of Scolytidae (Coleoptera). International Journal of Insect Morphology and Embryology, 2(3), 177–192. https://doi.org/10.1016/0020-7322(73)90027-5	Curculionidae	Pseudohylesinus sp		6	36		13
Payne, T. L., Moeck, H. A., Willson, C. D., Coulson, R. N., & Humphreys, W. J. (1973). Bark beetle olfaction-II. Antennal morphology of sixteen species of Scolytidae (Coleoptera). International Journal of Insect Morphology and Embryology, 2(3), 177–192. https://doi.org/10.1016/0020-7322(73)90027-5	Curculionidae	Scolytus rugulosus		6	22		9
Payne, T. L., Moeck, H. A., Willson, C. D., Coulson, R. N., & Humphreys, W. J. (1973). Bark beetle olfaction-II. Antennal morphology of sixteen species of Scolytidae (Coleoptera). International Journal of Insect Morphology and Embryology, 2(3), 177–192. https://doi.org/10.1016/0020-7322(73)90027-5	Curculionidae	Scolytus ventralis		6	30		9
Dyer, L. J., & Seabrook, W. D. (1975). Sensilla on the antennal flagellum of the sawyer beetles Monochamus notatus (Drury) and Monochamus scutellatus (Say) (Coleoptera: Cerambycidae). Journal of Morphology, 146(4), 513–531. https://doi.org/10.1002/jmor.1051460407	Cerambycidae	Monochamus notatus	25000	9	280	8	16
Dyer, L. J., & Seabrook, W. D. (1975). Sensilla on the antennal flagellum of the sawyer beetles Monochamus notatus (Drury) and Monochamus scutellatus (Say) (Coleoptera: Cerambycidae). Journal of Morphology, 146(4), 513–531. https://doi.org/10.1002/jmor.1051460407	Cerambycidae	Monochamus scutellatus	16000	9	280	8	16
Handique, G., Bhattacharyya, B., Baruah, A. A. L. H., & Boruah, R. (2017). Antenna morphology and sensilla microstructure of the male and female scarab beetle, Lepidiota mansueta Burmeister (Coleoptera: Scarabaeidae). Invertebrate Reproduction and Development, 61(3), 200–205. https://doi.org/10.1080/07924259.2017.1287784	Scarabaeidae	Lepidiota mansueta		3
Kim, J. L., & Yamasaki, T. (1996). Sensilla of Carabus (Isiocarabus) fiduciarius saishutoicus Csiki (Coleoptera: Carabidae). International Journal of Insect Morphology and Embryology, 25(1–2), 153–172. https://doi.org/10.1016/0020-7322(95)00015-1	Carabidae	Carabus fiduciarius	6214	15	121	6.3	19.9	3.1
Merivee, E., Ploomi, A., Rahi, M., Bresciani, J., Ravn, H. P., Luik, A., & Sammelselg, V. (2002). Antennal sensilla of the ground beetle Bembidion properans Steph. (Coleoptera, Carabidae). Micron, 33(5), 429–440. https://doi.org/10.1016/S0968-4328(02)00003-3	Carabidae	Bembidion properans	1793	13	49	2.15	10	3.5
Merivee, E., Ploomi, A., Rahi, M., Luik, A., & Sammelselg, V. (2002). Antennal sensilla of the ground beetle Bembidion lampros Hbst (Coleoptera, Carabidae). Micron, 33(5), 429–440. https://doi.org/10.1016/S0968-4328(02)00003-3	Carabidae	Bembidion lampros	1456	13	65	3	10	2
Pérez-González, S., & Zaballos, J. P. (2013). Antennal morphology of the endogean carabid genus Typhlocharis (Coleoptera: Carabidae: Anillini): Description of sensilla and taxonomic implications. Journal of Morphology, 274(7), 809–823. https://doi.org/10.1002/jmor.20140	Carabidae	Typhlocharis prima		11	34		10
Saïd, I., Tauban, D., Renou, M., Mori, K., & Rochat, D. (2003). Structure and function of the antennal sensilla of the palm weevil Rhynchophorus palmarum (Coleoptera, Curculionidae). Journal of Insect Physiology, 49(9), 857–872. https://doi.org/10.1016/S0022-1910(03)00137-9	Curculionidae	Rhynchophorus palmarum	57370	5
Zauli, A., Maurizi, E., Carpaneto, G. M., Chiari, S., Svensson, G. P., & Di Giulio, A. (2016). Antennal fine morphology of the threatened beetle Osmoderma eremita (Coleoptera: Scarabaeidae), revealed by scanning electron microscopy. Microscopy Research and Technique, 79(3), 178–191. https://doi.org/10.1002/jemt.22618	Scarabaeidae	Osmoderma eremita		12	70	5.8
