# Supplementary material for: Sensation of the tiniest kind: the antennal sensilla of the smallest free-living insect Scydosella musawasensis (Coleoptera: Ptiliidae)
Source: PeerJ. 2020 Nov 23;8:e10401. doi: 10.7717/peerj.10401 (PMC7690297; doi:10.7717/peerj.10401)
Supplement: Table S3 — We used the equation y = axb, where y is the value in question, a is elevation, x is body length, and b is slope. Slope, R2 and elevation values were calculated for two regression types, SMA and OLS. ChS, Sensillum chaeticum; BS1, Sensillum basiconicum type 1. *–variables correlate and b is significantly different from 0 (p < 0.01). [file peerj-08-10401-s003.xlsx]

## Sheet: results
Regression type	SMA			OLS
Parameter	a	b	R2	a	b	R2
Number of sensilla	358.1	1.31*	0.79	473.1	1.16*	0.79
Number of sensillum types	4.07	0.34	0.02	2.18	0.05	0.02
ChS length	14.55	0.811*	0.27	27.99	0.418*	0.27
ChS diameter	0.91	0.603*	0.79	1.04	0.537*	0.79
BS1 length	0.817	0.342	0.05	1.006	0.076	0.05
BS1 diameter	0.006	0.425	0.29	0.143	0.227	0.29
